# Supplementary material for: Characterization of a novel murine Sost ERT2 Cre model targeting osteocytes
Source: PubMed Central journal article supplement (PMC6382861; doi:10.1038/s41413-018-0037-4), 2019-02-21
Supplement: 41413_2018_37_MOESM2_ESM.pdf [file 41413_2018_37_MOESM2_ESM.pdf]

**Supplementary Table 1: 2 fold upregulated genes in both male and female gastrocnemius skeletal muscles.**

| Gene Symbol   | Gene Name                                         | Male: SOSTER2Cre vs WT |          |          |          | Female: SOSTER2Cre vs WT |          |          |          |
|---------------|---------------------------------------------------|------------------------|----------|----------|----------|--------------------------|----------|----------|----------|
|               |                                                   | Fold Change            | log2FC   | PValue   | FDR      | Fold Change              | log2FC   | PValue   | FDR      |
| 5430431A17Rik |                                                   | <b>5.3301237</b>       | 2.414169 | 7.71E-18 | 5.28E-16 | <b>2.161197</b>          | 1.111831 | 0.000202 | 0.029913 |
| Golga7b       | Golgin subfamily A member 7B                      | <b>5.1141334</b>       | 2.35449  | 3.71E-11 | 4.37E-10 | <b>2.6628236</b>         | 1.412957 | 0.000153 | 0.025753 |
| Wfdc17        | Activated macrophage/microglia WAP domain protein | <b>4.729846</b>        | 2.241793 | 7.62E-25 | 2.1E-22  | <b>2.0487446</b>         | 1.03474  | 0.000507 | 0.049864 |
| Spint2        | Kunitz-type protease inhibitor 2                  | <b>4.217001</b>        | 2.076217 | 5.42E-16 | 2.31E-14 | <b>2.269239</b>          | 1.182209 | 2.64E-05 | 0.009548 |
| Vps37d        | Vacuolar protein sorting-associated protein 37D   | <b>3.8614774</b>       | 1.949153 | 2.76E-06 | 1.07E-05 | <b>3.8742892</b>         | 1.953932 | 0.000417 | 0.044908 |
| Exoc3l4       | Exocyst complex component 3-like protein 4        | <b>3.6369363</b>       | 1.862724 | 8.58E-22 | 1.49E-19 | <b>2.6004857</b>         | 1.378781 | 1.27E-07 | 0.000256 |
| Cpxm1         | Probable carboxypeptidase X1                      | <b>2.9831074</b>       | 1.576816 | 2.19E-12 | 3.48E-11 | <b>2.0743611</b>         | 1.052667 | 2.94E-05 | 0.009866 |
| Hp            | Haptoglobin                                       | <b>2.9665773</b>       | 1.568799 | 1.6E-11  | 2.03E-10 | <b>2.0846849</b>         | 1.059829 | 3.28E-05 | 0.010496 |
| Sncg          | Gamma-synuclein                                   | <b>2.6982326</b>       | 1.432015 | 1.06E-08 | 6.75E-08 | <b>2.0338331</b>         | 1.024201 | 0.000126 | 0.022248 |
| Col27a1       | Collagen alpha-1(XXVII) chain                     | <b>2.618286</b>        | 1.388623 | 3.56E-09 | 2.54E-08 | <b>2.1283233</b>         | 1.089717 | 0.000112 | 0.020832 |
| Cdsn          | Corneodesmosin                                    | <b>2.5630368</b>       | 1.357854 | 0.028307 | 0.046299 | <b>3.9035725</b>         | 1.964795 | 0.000266 | 0.03526  |
| 2700046G09Rik |                                                   | <b>2.5076345</b>       | 1.326327 | 1.47E-08 | 9.18E-08 | <b>2.0507537</b>         | 1.036154 | 0.000176 | 0.027207 |
| Gkn3          | Gastroke-3                                        | <b>2.3127879</b>       | 1.209633 | 0.001336 | 0.002958 | <b>3.7394409</b>         | 1.902823 | 3.24E-06 | 0.00248  |
| Gale          | UDP-glucose 4-epimerase                           | <b>2.1806547</b>       | 1.124761 | 0.000344 | 0.000862 | <b>2.4363926</b>         | 1.284747 | 0.000402 | 0.044908 |
