# Supplementary material for: Characterization of a novel murine Sost ERT2 Cre model targeting osteocytes
Source: PubMed Central journal article supplement (PMC6382861; doi:10.1038/s41413-018-0037-4), 2019-02-21
Supplement: 41413_2018_37_MOESM3_ESM.pdf [file 41413_2018_37_MOESM3_ESM.pdf]

**Supplementary Table 2: 2 fold downregulated genes in both male and female gastrocnemius skeletal muscles.**

| Gene Symbol        | Gene Name                                                | Male: SOSTER2Cre vs WT |          |          |          | Female: SOSTER2Cre vs WT |          |          |          |
|--------------------|----------------------------------------------------------|------------------------|----------|----------|----------|--------------------------|----------|----------|----------|
|                    |                                                          | Fold Change            | log2FC   | PValue   | FDR      | Fold Change              | log2FC   | PValue   | FDR      |
| <b>Dmd</b>         | <b>Dystrophin</b>                                        | <b>-29.824117</b>      | -4.89841 | 3.3E-57  | 2.27E-53 | <b>-2.6070274</b>        | -1.38241 | 3.79E-06 | 0.002606 |
| Gbp10              | Guanylate-binding protein 10                             | <b>-12.718009</b>      | -3.6688  | 1.86E-08 | 1.14E-07 | <b>-5.4607004</b>        | -2.44909 | 0.000358 | 0.041749 |
| <b>Mstn (GDF8)</b> | <b>Myostatin,<br/>Growth/differentiation factor 8</b>    | <b>-11.057914</b>      | -3.46701 | 2.22E-24 | 5.55E-22 | <b>-2.3511303</b>        | -1.23335 | 0.000475 | 0.048011 |
| Gbp6               | Guanylate-binding protein 6                              | <b>-6.1230768</b>      | -2.61426 | 1.22E-13 | 2.77E-12 | <b>-2.4954495</b>        | -1.3193  | 8.01E-05 | 0.016216 |
| Fkbp5              | Peptidyl-prolyl cis-trans isomerase FKBP5                | <b>-5.5428065</b>      | -2.47062 | 8.17E-11 | 8.79E-10 | <b>-3.3412337</b>        | -1.74038 | 5.12E-05 | 0.012481 |
| Eya4               | Eyes absent homolog 4                                    | <b>-5.0925665</b>      | -2.34839 | 4.93E-22 | 9.29E-20 | <b>-2.087705</b>         | -1.06192 | 6.18E-05 | 0.014178 |
| Fzd4               | Frizzled-4                                               | <b>-4.9701481</b>      | -2.31329 | 2.29E-16 | 1.06E-14 | <b>-2.4276045</b>        | -1.27953 | 4.09E-05 | 0.011103 |
| Txlng              | Gamma-taxilin                                            | <b>-4.2328581</b>      | -2.08163 | 1.64E-14 | 4.84E-13 | <b>-2.0977106</b>        | -1.06882 | 0.000153 | 0.025753 |
| Cmtr1              | Cap-specific mRNA (nucleoside-2'-O-)-methyltransferase 1 | <b>-4.1480776</b>      | -2.05244 | 1.11E-08 | 7.1E-08  | <b>-2.5998467</b>        | -1.37843 | 6.45E-05 | 0.014262 |
| Atp13a3            | Probable cation-transporting ATPase 13A3                 | <b>-3.9475099</b>      | -1.98094 | 1.04E-12 | 1.86E-11 | <b>-2.1451963</b>        | -1.10111 | 0.000414 | 0.044908 |
| Slc40a1            | Solute carrier family 40 member 1                        | <b>-3.7715247</b>      | -1.91515 | 8.6E-14  | 2.04E-12 | <b>-2.0116614</b>        | -1.00839 | 0.000239 | 0.032517 |
| Cd36               | Platelet glycoprotein 4                                  | <b>-3.685569</b>       | -1.88189 | 3.58E-14 | 9.53E-13 | <b>-2.1161795</b>        | -1.08146 | 0.000101 | 0.019221 |
| Mettl21e           | Protein-lysine methyltransferase METTL21E                | <b>-3.2002335</b>      | -1.67818 | 7.93E-08 | 4.22E-07 | <b>-2.6975421</b>        | -1.43165 | 5.17E-05 | 0.012481 |
| Nox4               | NADPH oxidase 4                                          | <b>-3.184863</b>       | -1.67123 | 9.45E-08 | 4.96E-07 | <b>-3.7366635</b>        | -1.90175 | 8.87E-07 | 0.001087 |
| Nbea               | Neurobeachin                                             | <b>-2.8270665</b>      | -1.49931 | 6.67E-11 | 7.35E-10 | <b>-2.1647411</b>        | -1.11419 | 4.2E-05  | 0.011103 |
| Cat                | Catalase                                                 | <b>-2.7521112</b>      | -1.46054 | 2.44E-12 | 3.84E-11 | <b>-2.1291806</b>        | -1.0903  | 3.52E-06 | 0.002549 |
| Cdc14a             | Dual specificity protein phosphatase CDC14A              | <b>-2.6794811</b>      | -1.42195 | 9.94E-13 | 1.78E-11 | <b>-2.3181978</b>        | -1.213   | 1.01E-07 | 0.000256 |
| 3110057O12Rik      |                                                          | <b>-2.6459436</b>      | -1.40378 | 1.46E-06 | 5.98E-06 | <b>-2.7224126</b>        | -1.44489 | 1.37E-05 | 0.006077 |
| Tmem100            | Transmembrane protein 100                                | <b>-2.6254687</b>      | -1.39257 | 2.02E-06 | 8.07E-06 | <b>-2.195274</b>         | -1.1344  | 0.000511 | 0.049864 |
| Prrg1              | Proline-rich Gla (G-carboxyglutamic acid) 1              | <b>-2.1795649</b>      | -1.12404 | 0.000199 | 0.000523 | <b>-2.6000566</b>        | -1.37854 | 0.000107 | 0.020075 |
| <b>Musk</b>        | <b>Muscle, skeletal receptor tyrosine-protein kinase</b> | <b>-2.1793576</b>      | -1.1239  | 3.08E-06 | 1.19E-05 | <b>-2.0473836</b>        | -1.03378 | 0.000288 | 0.03707  |
