# Supplementary material for: Characterization of a novel murine Sost ERT2 Cre model targeting osteocytes
Source: PubMed Central journal article supplement (PMC6382861; doi:10.1038/s41413-018-0037-4), 2019-02-21
Supplement: 41413_2018_37_MOESM4_ESM.pdf [file 41413_2018_37_MOESM4_ESM.pdf]

**Supplementary Table 3: Inflammation-related genes upregulated in male gastrocnemius skeletal muscle.**

| Gene Symbol | Gene Name                                                        | Male: SOSTER2Cre vs WT |          |          |          | Female: SOSTER2Cre vs WT |          |          |          |
|-------------|------------------------------------------------------------------|------------------------|----------|----------|----------|--------------------------|----------|----------|----------|
|             |                                                                  | Fold Change            | log2FC   | PValue   | FDR      | Fold Change              | log2FC   | PValue   | FDR      |
| Ccl4        | C-C motif chemokine 4                                            | <b>174.19128</b>       | 7.444529 | 8.04E-10 | 6.81E-09 | <b>2.2033255</b>         | 1.139683 | 3.75E-01 | 0.662883 |
| Ccl3        | C-C motif chemokine 3                                            | <b>160.8137</b>        | 7.329246 | 6.99E-11 | 7.66E-10 | <b>1.4466868</b>         | 0.532753 | 0.737941 | 0.889174 |
| Pf4         | Platelet factor 4                                                | <b>5.2050607</b>       | 2.379915 | 2.9E-16  | 1.31E-14 | <b>-1.0411993</b>        | -0.05825 | 0.854236 | 0.942731 |
| Myh8        | Myosin-8                                                         | <b>30.052684</b>       | 4.909422 | 1.23E-92 | 1.69E-88 | <b>1.5624392</b>         | 0.6438   | 0.009273 | 0.146331 |
| Ccl2        | C-C motif chemokine 2                                            | <b>27.164287</b>       | 4.763639 | 4.62E-10 | 4.16E-09 | <b>1.5665813</b>         | 0.64762  | 0.436081 | 0.712258 |
| Ccl22       | C-C motif chemokine 22                                           | <b>27.164287</b>       | 4.763639 | 4.62E-10 | 4.16E-09 | <b>1.5665813</b>         | 0.64762  | 0.436081 | 0.712258 |
| Ccl8        | C-C motif chemokine 8                                            | <b>21.976452</b>       | 4.457887 | 1.78E-32 | 1.36E-29 | <b>1.178543</b>          | 0.237004 | 0.598476 | 0.812775 |
| Ccl7        | C-C motif chemokine 7                                            | <b>16.376776</b>       | 4.033579 | 8.96E-13 | 1.62E-11 | <b>2.8784375</b>         | 1.525286 | 2.17E-02 | 0.199236 |
| Plcb2       | 1-phosphatidylinositol 4,5-bisphosphate phosphodiesterase beta-2 | <b>9.9169393</b>       | 3.309895 | 8.65E-09 | 5.64E-08 | <b>1.2035022</b>         | 0.267239 | 0.692426 | 0.867187 |
| Ccl5        | C-C motif chemokine 5                                            | <b>8.6985258</b>       | 3.120771 | 2.26E-08 | 1.34E-07 | <b>1.3328662</b>         | 0.414532 | 0.677954 | 0.858467 |
| Myh3        | Myosin-3                                                         | <b>8.7146133</b>       | 3.123437 | 1.07E-32 | 9.19E-30 | <b>-1.2944247</b>        | -0.37231 | 0.193602 | 0.491597 |
| Rac2        | Ras-related C3 botulinum toxin substrate 2                       | <b>8.3208204</b>       | 3.056726 | 6.94E-21 | 9.94E-19 | <b>1.4827811</b>         | 0.568306 | 0.110883 | 0.382299 |
| Vav1        | Proto-oncogene vav                                               | <b>7.0838837</b>       | 2.824541 | 1.23E-15 | 4.74E-14 | <b>1.1921464</b>         | 0.253561 | 0.55916  | 0.789943 |
| Ccr2        | C-C chemokine receptor type 2                                    | <b>5.3174547</b>       | 2.410736 | 1.07E-18 | 9.18E-17 | <b>1.2206407</b>         | 0.287639 | 0.349458 | 0.641482 |
| Itgb2       | Integrin beta-2                                                  | <b>5.2947291</b>       | 2.404557 | 3.45E-17 | 2.03E-15 | <b>-1.0024571</b>        | -0.00354 | 0.991125 | 0.99747  |
| Junb        | Transcription factor jun-B                                       | <b>5.6495228</b>       | 2.498129 | 8.1E-22  | 1.44E-19 | <b>1.1373908</b>         | 0.185728 | 0.505641 | 0.762057 |
| Ccl12       | C-C motif chemokine 12                                           | <b>5.532536</b>        | 2.467941 | 2.58E-05 | 8.15E-05 | <b>-1.4765529</b>        | -0.56223 | 0.461588 | 0.730471 |
| Cxcl10      | C-X-C motif chemokine 10                                         | <b>5.2177127</b>       | 2.383418 | 6.58E-08 | 3.56E-07 | <b>1.3832326</b>         | 0.468044 | 0.434558 | 0.711509 |
| Alox5ap     | Arachidonate 5-lipoxygenase-activating protein                   | <b>5.1059278</b>       | 2.352173 | 9.13E-20 | 9.81E-18 | <b>1.0665107</b>         | 0.092898 | 0.743214 | 0.890822 |
| Ptk2b       | Protein-tyrosine kinase 2-beta                                   | <b>5.0660339</b>       | 2.340857 | 3.82E-10 | 3.53E-09 | 1.388703                 | 0.473738 | 0.274486 | 0.575331 |
